# Supplementary material
Source: publisher site journal article supplement (https://www.dovepress.com/get_supplementary_file.php?f=193808-TS6.xlsx)
Supplement: Supplementary file 1 [file get_supplementary_file.php]

## Sheet: TableS6
TableS6: KEGG pathways enriched of the DEGs between S2 and S3
KEGG_term	Num_genes	p_adjust	pvalue
Renin-angiotensin system	3	0.0234328	0.000251966
Fructose and mannose metabolism	3	0.025309	0.000747222
Pentose and glucuronate interconversions	3	0.025309	0.000816419
Phenylalanine metabolism	2	0.0734552	0.00379531
Steroid hormone biosynthesis	3	0.0734552	0.00403347
Pantothenate and CoA biosynthesis	2	0.0734552	0.00473904
Glycolysis / Gluconeogenesis	3	0.0798416	0.00600959
Biosynthesis of amino acids	3	0.0799941	0.00788556
Folate biosynthesis	2	0.0799941	0.00879117
Drug metabolism - other enzymes	3	0.0799941	0.00909627
Ascorbate and aldarate metabolism	2	0.0799941	0.00946167
Nicotinate and nicotinamide metabolism	2	0.0899389	0.011605
Protein digestion and absorption	3	0.0927416	0.0129639
Pyruvate metabolism	2	0.127305	0.0191643
Porphyrin and chlorophyll metabolism	2	0.136642	0.022039
Arginine and proline metabolism	2	0.177318	0.0305063
Arachidonic acid metabolism	2	0.254489	0.0465195
Retinol metabolism	2	0.261479	0.0519512
Bile secretion	2	0.261479	0.0575991
Ubiquinone and other terpenoid-quinone biosynthesis	1	0.261479	0.0587909
Drug metabolism - cytochrome P450	2	0.261479	0.0590436
Metabolism of xenobiotics by cytochrome P450	2	0.274543	0.0649457
Purine metabolism	3	0.28122	0.0695489
Chemical carcinogenesis	2	0.287346	0.0741537
Pancreatic secretion	2	0.35125	0.0971131
Glycerophospholipid metabolism	2	0.35125	0.098824
One carbon pool by folate	1	0.35125	0.104372
Pyrimidine metabolism	2	0.35125	0.105753
Other types of O-glycan biosynthesis	1	0.354876	0.114205
Histidine metabolism	1	0.354876	0.119082
Proximal tubule bicarbonate reclamation	1	0.354876	0.119082
Vitamin digestion and absorption	1	0.354876	0.123932
alpha-Linolenic acid metabolism	1	0.354876	0.128757
Carbon metabolism	2	0.354876	0.132824
Maturity onset diabetes of the young	1	0.354876	0.133555
Linoleic acid metabolism	1	0.356495	0.147797
Citrate cycle (TCA cycle)	1	0.356495	0.152493
Pentose phosphate pathway	1	0.356495	0.152493
Galactose metabolism	1	0.356495	0.157164
beta-Alanine metabolism	1	0.356495	0.157164
Antifolate resistance	1	0.356495	0.157164
Insulin signaling pathway	2	0.3723	0.172988
Alanine, aspartate and glutamate metabolism	1	0.3723	0.175599
Tyrosine metabolism	1	0.3723	0.180145
Starch and sucrose metabolism	1	0.3723	0.180145
Glycine, serine and threonine metabolism	1	0.400484	0.198089
Fat digestion and absorption	1	0.40072	0.202515
ABC transporters	1	0.408292	0.215649
Type II diabetes mellitus	1	0.408292	0.224288
Cysteine and methionine metabolism	1	0.408292	0.228573
Ether lipid metabolism	1	0.408292	0.228573
Valine, leucine and isoleucine degradation	1	0.408292	0.232834
Notch signaling pathway	1	0.408292	0.232834
Ovarian steroidogenesis	1	0.408292	0.237073
Amyotrophic lateral sclerosis (ALS)	1	0.415086	0.245481
Chemokine signaling pathway	2	0.462009	0.278199
Glycerolipid metabolism	1	0.466935	0.286186
Cortisol synthesis and secretion	1	0.477786	0.297974
Adipocytokine signaling pathway	1	0.497524	0.3172
Prolactin signaling pathway	1	0.497524	0.320983
Platinum drug resistance	1	0.503868	0.33221
PPAR signaling pathway	1	0.503868	0.335912
Pertussis	1	0.506711	0.343256
Cardiac muscle contraction	1	0.50935	0.350521
ECM-receptor interaction	1	0.519026	0.364815
Hypertrophic cardiomyopathy (HCM)	1	0.519026	0.368341
Rheumatoid arthritis	1	0.536788	0.39249
Dilated cardiomyopathy (DCM)	1	0.536788	0.39249
IL-17 signaling pathway	1	0.542583	0.402562
Hematopoietic cell lineage	1	0.552337	0.415738
Glucagon signaling pathway	1	0.569751	0.434972
Parathyroid hormone synthesis, secretion and action	1	0.570038	0.444355
Insulin resistance	1	0.570038	0.447449
Thyroid hormone signaling pathway	1	0.59066	0.47455
Cytokine-cytokine receptor interaction	2	0.59066	0.484018
AMPK signaling pathway	1	0.59066	0.486174
Vascular smooth muscle contraction	1	0.59066	0.489041
Autophagy - animal	1	0.606497	0.508675
FoxO signaling pathway	1	0.611636	0.519562
Estrogen signaling pathway	1	0.619426	0.53284
Adrenergic signaling in cardiomyocytes	1	0.629015	0.55083
Human papillomavirus infection	2	0.629015	0.561489
Non-alcoholic fatty liver disease (NAFLD)	1	0.629015	0.563264
mTOR signaling pathway	1	0.629015	0.568143
Cushing syndrome	1	0.629513	0.575362
PI3K-Akt signaling pathway	2	0.633146	0.58549
Alzheimer disease	1	0.65645	0.614099
Axon guidance	1	0.65808	0.6227
Calcium signaling pathway	1	0.668079	0.639344
cAMP signaling pathway	1	0.685248	0.668643
Focal adhesion	1	0.685248	0.670512
Ras signaling pathway	1	0.73462	0.726721
Neuroactive ligand-receptor interaction	1	0.788538	0.788538
